# Supplementary material for: Phylogeny and evolution of infectious bursal disease virus circulating in Turkish broiler flocks
Source: PubMed Central journal article supplement — Poult Sci. 2019 Jan 18;98(5):1976–84. doi: 10.3382/ps/pey551 (PMC6448131; doi:10.3382/ps/pey551), 2019-01-18
Supplement: pey551_supplemental_file.pdf [file pey551_supplemental_file.pdf]

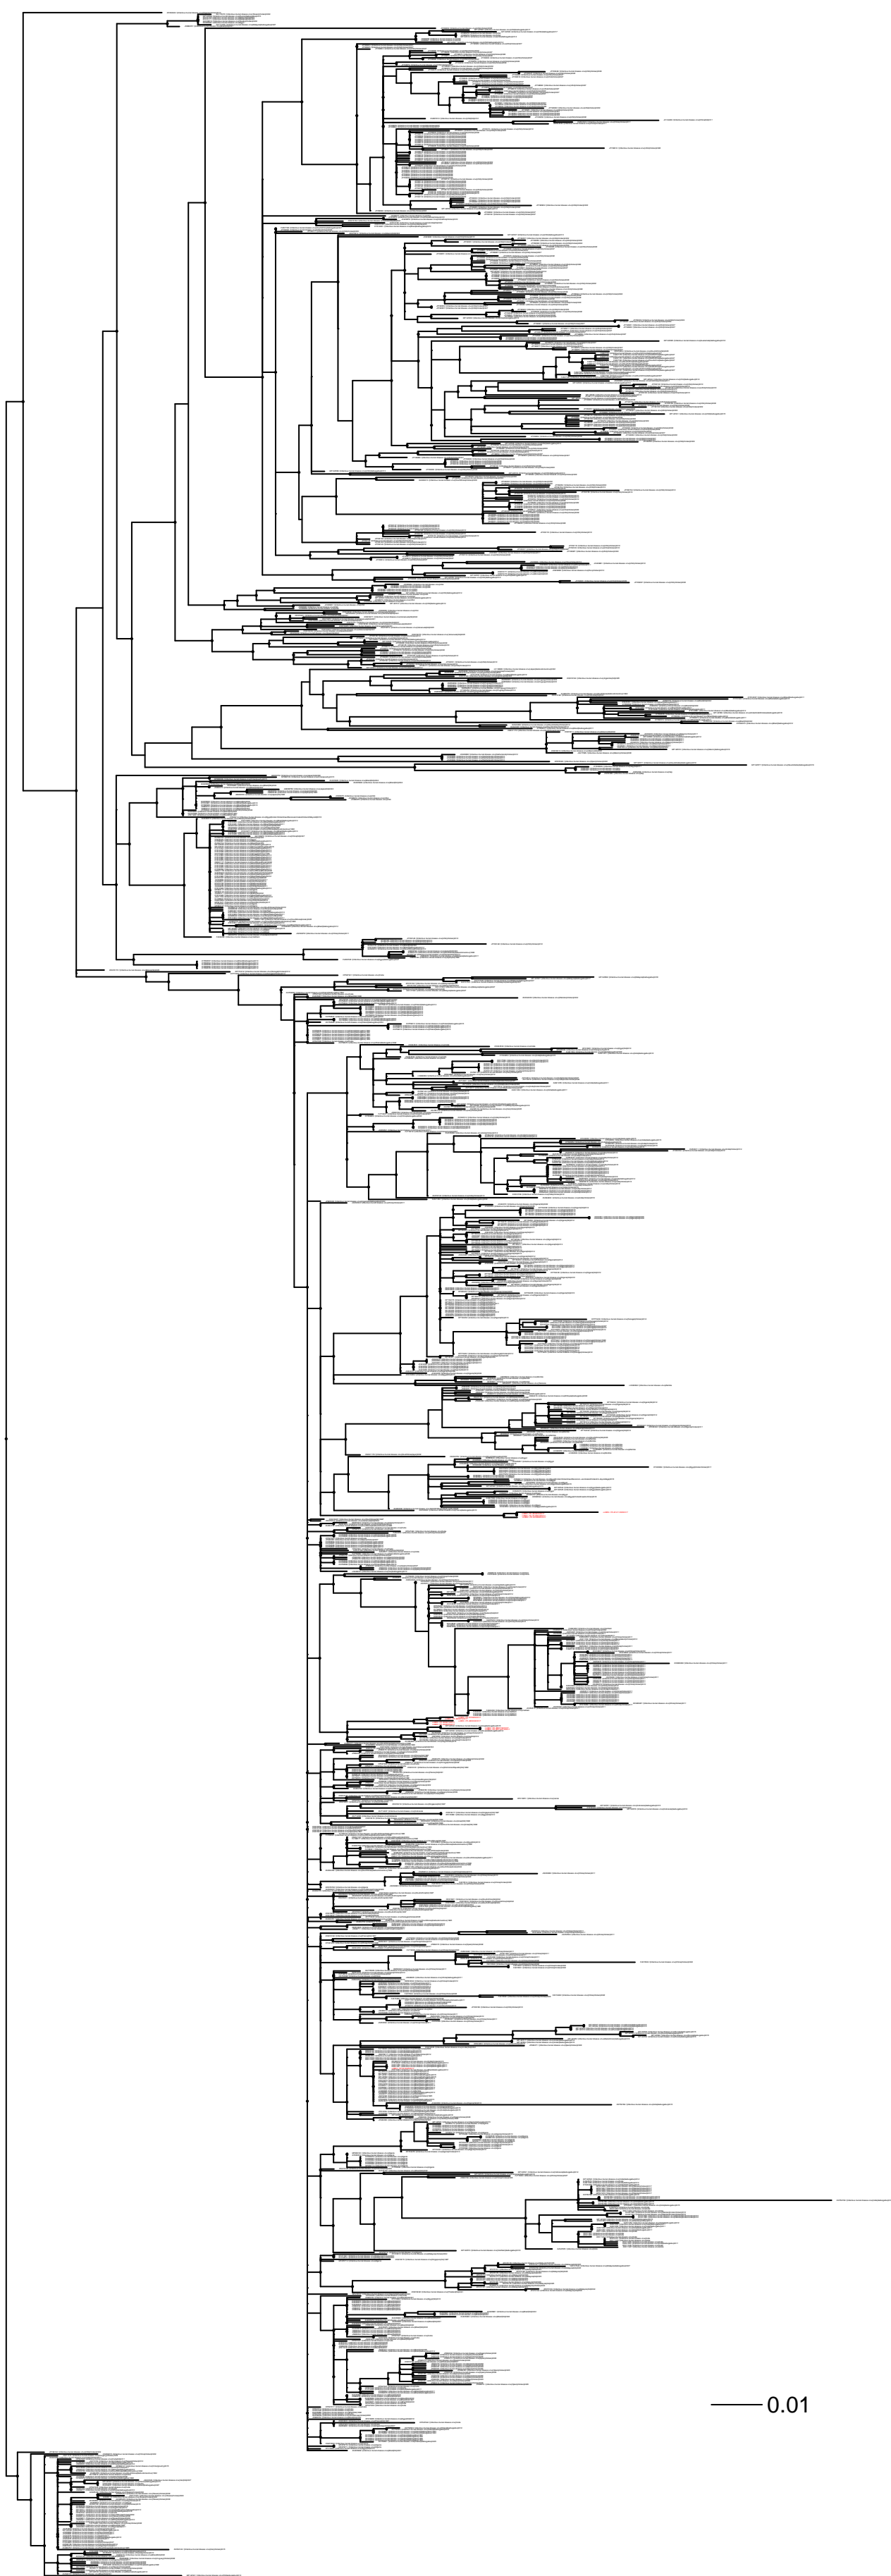

Supplementary figure 1. Maximum likelihood phylogenetic tree based on non recombinant strains. Nodes displaying a bootstrap support higher that 70% are represented as black circles.It is possible to zoom in to appreciate further details and tip labels. Turkish strains have been colored in red
